# Supplementary material for: The effects of hydrogen treatment in a cigarette smoke solution-induced chronic obstructive pulmonary disease-like changes in an animal model
Source: PubMed Central journal article supplement — J Thorac Dis. 2022 Nov;14(11):4246–55. doi: 10.21037/jtd-22-324 (PMC9745525; doi:10.21037/jtd-22-324), 2022-11
Supplement: jtd-14-11-4246-coif.pdf [file jtd-14-11-4246-coif.pdf]

## ICMJE DISCLOSURE FORM

Date: 2022/03/05

Your Name: Hui-Ju Yang

Manuscript Title: The Effects of Oxy-Hydrogen Medical Technology in Cigarette Smoke Solution-Induced Chronic Obstructive Pulmonary Disease Animal Model

Manuscript number (if known): \_\_\_\_\_

In the interest of transparency, we ask you to disclose all relationships/activities/interests listed below that are related to the content of your manuscript. "Related" means any relation with for-profit or not-for-profit third parties whose interests may be affected by the content of the manuscript. Disclosure represents a commitment to transparency and does not necessarily indicate a bias. If you are in doubt about whether to list a relationship/activity/interest, it is preferable that you do so.

The following questions apply to the author's relationships/activities/interests as they relate to the **current manuscript only**.

The author's relationships/activities/interests should be **defined broadly**. For example, if your manuscript pertains to the epidemiology of hypertension, you should declare all relationships with manufacturers of antihypertensive medication, even if that medication is not mentioned in the manuscript.

In item #1 below, report all support for the work reported in this manuscript without time limit. For all other items, the time frame for disclosure is the past 36 months.

|                                                           |                                                                                                                                                                                | Name all entities with whom you have this relationship or indicate none (add rows as needed) | Specifications/Comments (e.g., if payments were made to you or to your institution) |
|-----------------------------------------------------------|--------------------------------------------------------------------------------------------------------------------------------------------------------------------------------|----------------------------------------------------------------------------------------------|-------------------------------------------------------------------------------------|
| <b>Time frame: Since the initial planning of the work</b> |                                                                                                                                                                                |                                                                                              |                                                                                     |
| 1                                                         | All support for the present manuscript (e.g., funding, provision of study materials, medical writing, article processing charges, etc.)<br><b>No time limit for this item.</b> | HOHO Biotech Co.,Ltd.                                                                        | HOHO Biotech provided funding and supplied the oxy-hydrogen device for this study.  |
|                                                           |                                                                                                                                                                                |                                                                                              |                                                                                     |
|                                                           |                                                                                                                                                                                |                                                                                              |                                                                                     |
|                                                           |                                                                                                                                                                                |                                                                                              |                                                                                     |
|                                                           |                                                                                                                                                                                |                                                                                              |                                                                                     |
|                                                           |                                                                                                                                                                                |                                                                                              |                                                                                     |
|                                                           |                                                                                                                                                                                |                                                                                              |                                                                                     |
| <b>Time frame: past 36 months</b>                         |                                                                                                                                                                                |                                                                                              |                                                                                     |
| 2                                                         | Grants or contracts from any entity (if not indicated in item #1 above).                                                                                                       | <u>  V  </u> None                                                                            |                                                                                     |
| 3                                                         | Royalties or licenses                                                                                                                                                          | <u>  V  </u> None                                                                            |                                                                                     |
| 4                                                         | Consulting fees                                                                                                                                                                | The medical advisor of HOHO Biotech Co.,Ltd.                                                 |                                                                                     |
|                                                           |                                                                                                                                                                                |                                                                                              |                                                                                     |
|                                                           |                                                                                                                                                                                |                                                                                              |                                                                                     |

|    |                                                                                                              |                                   |  |
|----|--------------------------------------------------------------------------------------------------------------|-----------------------------------|--|
| 5  | Payment or honoraria for lectures, presentations, speakers bureaus, manuscript writing or educational events | <u>  </u> <u>V</u> <u>  </u> None |  |
|    |                                                                                                              |                                   |  |
|    |                                                                                                              |                                   |  |
| 6  | Payment for expert testimony                                                                                 | <u>  </u> <u>V</u> <u>  </u> None |  |
|    |                                                                                                              |                                   |  |
|    |                                                                                                              |                                   |  |
| 7  | Support for attending meetings and/or travel                                                                 | <u>  </u> <u>V</u> <u>  </u> None |  |
|    |                                                                                                              |                                   |  |
|    |                                                                                                              |                                   |  |
| 8  | Patents planned, issued or pending                                                                           | <u>  </u> <u>V</u> <u>  </u> None |  |
|    |                                                                                                              |                                   |  |
|    |                                                                                                              |                                   |  |
| 9  | Participation on a Data Safety Monitoring Board or Advisory Board                                            | <u>  </u> <u>V</u> <u>  </u> None |  |
|    |                                                                                                              |                                   |  |
|    |                                                                                                              |                                   |  |
| 10 | Leadership or fiduciary role in other board, society, committee or advocacy group, paid or unpaid            | <u>  </u> <u>V</u> <u>  </u> None |  |
|    |                                                                                                              |                                   |  |
|    |                                                                                                              |                                   |  |
| 11 | Stock or stock options                                                                                       | <u>  </u> <u>V</u> <u>  </u> None |  |
|    |                                                                                                              |                                   |  |
|    |                                                                                                              |                                   |  |
| 12 | Receipt of equipment, materials, drugs, medical writing, gifts or other services                             | <u>  </u> <u>V</u> <u>  </u> None |  |
|    |                                                                                                              |                                   |  |
|    |                                                                                                              |                                   |  |
| 13 | Other financial or non-financial interests                                                                   | <u>  </u> <u>V</u> <u>  </u> None |  |
|    |                                                                                                              |                                   |  |
|    |                                                                                                              |                                   |  |

**Please summarize the above conflict of interest in the following box:**

I, Hui-Ju Yang, a medical advisor of HOHO Biotech, which provided funding and supplied the oxy-hydrogen device for this study.

**Please place an "X" next to the following statement to indicate your agreement:**

   **X** **I certify that I have answered every question and have not altered the wording of any of the questions on this form.**

## ICMJE DISCLOSURE FORM

Date: 2022/03/01

Your Name: Wen-Hsin Tsou

Manuscript Title: The Effects of Oxy-Hydrogen Medical Technology in Cigarette Smoke Solution-Induced Chronic Obstructive Pulmonary Disease Animal Model

Manuscript number (if known): \_\_\_\_\_

In the interest of transparency, we ask you to disclose all relationships/activities/interests listed below that are related to the content of your manuscript. "Related" means any relation with for-profit or not-for-profit third parties whose interests may be affected by the content of the manuscript. Disclosure represents a commitment to transparency and does not necessarily indicate a bias. If you are in doubt about whether to list a relationship/activity/interest, it is preferable that you do so.

The following questions apply to the author's relationships/activities/interests as they relate to the **current manuscript only**.

The author's relationships/activities/interests should be **defined broadly**. For example, if your manuscript pertains to the epidemiology of hypertension, you should declare all relationships with manufacturers of antihypertensive medication, even if that medication is not mentioned in the manuscript.

In item #1 below, report all support for the work reported in this manuscript without time limit. For all other items, the time frame for disclosure is the past 36 months.

|                                                           |                                                                                                                                                                                | Name all entities with whom you have this relationship or indicate none (add rows as needed) | Specifications/Comments (e.g., if payments were made to you or to your institution) |
|-----------------------------------------------------------|--------------------------------------------------------------------------------------------------------------------------------------------------------------------------------|----------------------------------------------------------------------------------------------|-------------------------------------------------------------------------------------|
| <b>Time frame: Since the initial planning of the work</b> |                                                                                                                                                                                |                                                                                              |                                                                                     |
| 1                                                         | All support for the present manuscript (e.g., funding, provision of study materials, medical writing, article processing charges, etc.)<br><b>No time limit for this item.</b> | The employee of HOHO Biotech Co.,Ltd.                                                        | HOHO Biotech provided funding and supplied the oxy-hydrogen device for this study.  |
|                                                           |                                                                                                                                                                                |                                                                                              |                                                                                     |
|                                                           |                                                                                                                                                                                |                                                                                              |                                                                                     |
|                                                           |                                                                                                                                                                                |                                                                                              |                                                                                     |
|                                                           |                                                                                                                                                                                |                                                                                              |                                                                                     |
|                                                           |                                                                                                                                                                                |                                                                                              |                                                                                     |
| <b>Time frame: past 36 months</b>                         |                                                                                                                                                                                |                                                                                              |                                                                                     |
| 2                                                         | Grants or contracts from any entity (if not indicated in item #1 above).                                                                                                       | <u>  V  </u> None                                                                            |                                                                                     |
|                                                           |                                                                                                                                                                                |                                                                                              |                                                                                     |
| 3                                                         | Royalties or licenses                                                                                                                                                          | <u>  V  </u> None                                                                            |                                                                                     |
|                                                           |                                                                                                                                                                                |                                                                                              |                                                                                     |
| 4                                                         | Consulting fees                                                                                                                                                                | <u>  V  </u> None                                                                            |                                                                                     |
|                                                           |                                                                                                                                                                                |                                                                                              |                                                                                     |
| 5                                                         |                                                                                                                                                                                | <u>  V  </u> None                                                                            |                                                                                     |



## ICMJE DISCLOSURE FORM

Date: 2022/03/02

Your Name: Min-Chung Shen

Manuscript Title: The Effects of Oxy-Hydrogen Medical Technology in Cigarette Smoke Solution-Induced Chronic Obstructive Pulmonary Disease Animal Model

Manuscript number (if known): \_\_\_\_\_

In the interest of transparency, we ask you to disclose all relationships/activities/interests listed below that are related to the content of your manuscript. "Related" means any relation with for-profit or not-for-profit third parties whose interests may be affected by the content of the manuscript. Disclosure represents a commitment to transparency and does not necessarily indicate a bias. If you are in doubt about whether to list a relationship/activity/interest, it is preferable that you do so.

The following questions apply to the author's relationships/activities/interests as they relate to the **current manuscript only**.

The author's relationships/activities/interests should be **defined broadly**. For example, if your manuscript pertains to the epidemiology of hypertension, you should declare all relationships with manufacturers of antihypertensive medication, even if that medication is not mentioned in the manuscript.

In item #1 below, report all support for the work reported in this manuscript without time limit. For all other items, the time frame for disclosure is the past 36 months.

|                                                           |                                                                                                                                                                                | Name all entities with whom you have this relationship or indicate none (add rows as needed) | Specifications/Comments (e.g., if payments were made to you or to your institution) |
|-----------------------------------------------------------|--------------------------------------------------------------------------------------------------------------------------------------------------------------------------------|----------------------------------------------------------------------------------------------|-------------------------------------------------------------------------------------|
| <b>Time frame: Since the initial planning of the work</b> |                                                                                                                                                                                |                                                                                              |                                                                                     |
| 1                                                         | All support for the present manuscript (e.g., funding, provision of study materials, medical writing, article processing charges, etc.)<br><b>No time limit for this item.</b> | <u>  V  </u> None                                                                            |                                                                                     |
|                                                           |                                                                                                                                                                                |                                                                                              |                                                                                     |
|                                                           |                                                                                                                                                                                |                                                                                              |                                                                                     |
|                                                           |                                                                                                                                                                                |                                                                                              |                                                                                     |
|                                                           |                                                                                                                                                                                |                                                                                              |                                                                                     |
|                                                           |                                                                                                                                                                                |                                                                                              |                                                                                     |
| <b>Time frame: past 36 months</b>                         |                                                                                                                                                                                |                                                                                              |                                                                                     |
| 2                                                         | Grants or contracts from any entity (if not indicated in item #1 above).                                                                                                       | <u>  V  </u> None                                                                            |                                                                                     |
|                                                           |                                                                                                                                                                                |                                                                                              |                                                                                     |
| 3                                                         | Royalties or licenses                                                                                                                                                          | <u>  V  </u> None                                                                            |                                                                                     |
|                                                           |                                                                                                                                                                                |                                                                                              |                                                                                     |
| 4                                                         | Consulting fees                                                                                                                                                                | <u>  V  </u> None                                                                            |                                                                                     |
|                                                           |                                                                                                                                                                                |                                                                                              |                                                                                     |
|                                                           |                                                                                                                                                                                |                                                                                              |                                                                                     |

|    |                                                                                                              |                   |  |
|----|--------------------------------------------------------------------------------------------------------------|-------------------|--|
| 5  | Payment or honoraria for lectures, presentations, speakers bureaus, manuscript writing or educational events | <u>  V  </u> None |  |
| 6  | Payment for expert testimony                                                                                 | <u>  V  </u> None |  |
| 7  | Support for attending meetings and/or travel                                                                 | <u>  V  </u> None |  |
| 8  | Patents planned, issued or pending                                                                           | <u>  V  </u> None |  |
| 9  | Participation on a Data Safety Monitoring Board or Advisory Board                                            | <u>  V  </u> None |  |
| 10 | Leadership or fiduciary role in other board, society, committee or advocacy group, paid or unpaid            | <u>  V  </u> None |  |
| 11 | Stock or stock options                                                                                       | <u>  V  </u> None |  |
| 12 | Receipt of equipment, materials, drugs, medical writing, gifts or other services                             | <u>  V  </u> None |  |
| 13 | Other financial or non-financial interests                                                                   | <u>  V  </u> None |  |

**Please summarize the above conflict of interest in the following box:**

I, Min-Chung Shen, have no conflicts of interest to declare that are relevant to the content of this article.

**Please place an "X" next to the following statement to indicate your agreement:**

  X   I certify that I have answered every question and have not altered the wording of any of the questions on this form.

## ICMJE DISCLOSURE FORM

Date: 2022/03/02

Your Name: Chianyi Liu

Manuscript Title: The Effects of Oxy-Hydrogen Medical Technology in Cigarette Smoke Solution-Induced Chronic Obstructive Pulmonary Disease Animal Model

Manuscript number (if known): \_\_\_\_\_

In the interest of transparency, we ask you to disclose all relationships/activities/interests listed below that are related to the content of your manuscript. "Related" means any relation with for-profit or not-for-profit third parties whose interests may be affected by the content of the manuscript. Disclosure represents a commitment to transparency and does not necessarily indicate a bias. If you are in doubt about whether to list a relationship/activity/interest, it is preferable that you do so.

The following questions apply to the author's relationships/activities/interests as they relate to the **current manuscript only**.

The author's relationships/activities/interests should be **defined broadly**. For example, if your manuscript pertains to the epidemiology of hypertension, you should declare all relationships with manufacturers of antihypertensive medication, even if that medication is not mentioned in the manuscript.

In item #1 below, report all support for the work reported in this manuscript without time limit. For all other items, the time frame for disclosure is the past 36 months.

|                                                           |                                                                                                                                                                                | Name all entities with whom you have this relationship or indicate none (add rows as needed) | Specifications/Comments (e.g., if payments were made to you or to your institution) |
|-----------------------------------------------------------|--------------------------------------------------------------------------------------------------------------------------------------------------------------------------------|----------------------------------------------------------------------------------------------|-------------------------------------------------------------------------------------|
| <b>Time frame: Since the initial planning of the work</b> |                                                                                                                                                                                |                                                                                              |                                                                                     |
| 1                                                         | All support for the present manuscript (e.g., funding, provision of study materials, medical writing, article processing charges, etc.)<br><b>No time limit for this item.</b> | <u>  V  </u> None                                                                            |                                                                                     |
|                                                           |                                                                                                                                                                                |                                                                                              |                                                                                     |
|                                                           |                                                                                                                                                                                |                                                                                              |                                                                                     |
|                                                           |                                                                                                                                                                                |                                                                                              |                                                                                     |
|                                                           |                                                                                                                                                                                |                                                                                              |                                                                                     |
|                                                           |                                                                                                                                                                                |                                                                                              |                                                                                     |
| <b>Time frame: past 36 months</b>                         |                                                                                                                                                                                |                                                                                              |                                                                                     |
| 2                                                         | Grants or contracts from any entity (if not indicated in item #1 above).                                                                                                       | <u>  V  </u> None                                                                            |                                                                                     |
|                                                           |                                                                                                                                                                                |                                                                                              |                                                                                     |
| 3                                                         | Royalties or licenses                                                                                                                                                          | <u>  V  </u> None                                                                            |                                                                                     |
|                                                           |                                                                                                                                                                                |                                                                                              |                                                                                     |
| 4                                                         | Consulting fees                                                                                                                                                                | <u>  V  </u> None                                                                            |                                                                                     |
|                                                           |                                                                                                                                                                                |                                                                                              |                                                                                     |
|                                                           |                                                                                                                                                                                |                                                                                              |                                                                                     |

|    |                                                                                                              |                                      |  |
|----|--------------------------------------------------------------------------------------------------------------|--------------------------------------|--|
| 5  | Payment or honoraria for lectures, presentations, speakers bureaus, manuscript writing or educational events | <u>  </u> <u>  </u> V <u>  </u> None |  |
|    |                                                                                                              |                                      |  |
|    |                                                                                                              |                                      |  |
| 6  | Payment for expert testimony                                                                                 | <u>  </u> <u>  </u> V <u>  </u> None |  |
|    |                                                                                                              |                                      |  |
|    |                                                                                                              |                                      |  |
| 7  | Support for attending meetings and/or travel                                                                 | <u>  </u> <u>  </u> V <u>  </u> None |  |
|    |                                                                                                              |                                      |  |
|    |                                                                                                              |                                      |  |
| 8  | Patents planned, issued or pending                                                                           | <u>  </u> <u>  </u> V <u>  </u> None |  |
|    |                                                                                                              |                                      |  |
|    |                                                                                                              |                                      |  |
| 9  | Participation on a Data Safety Monitoring Board or Advisory Board                                            | <u>  </u> <u>  </u> V <u>  </u> None |  |
|    |                                                                                                              |                                      |  |
|    |                                                                                                              |                                      |  |
| 10 | Leadership or fiduciary role in other board, society, committee or advocacy group, paid or unpaid            | <u>  </u> <u>  </u> V <u>  </u> None |  |
|    |                                                                                                              |                                      |  |
|    |                                                                                                              |                                      |  |
| 11 | Stock or stock options                                                                                       | <u>  </u> <u>  </u> V <u>  </u> None |  |
|    |                                                                                                              |                                      |  |
|    |                                                                                                              |                                      |  |
| 12 | Receipt of equipment, materials, drugs, medical writing, gifts or other services                             | <u>  </u> <u>  </u> V <u>  </u> None |  |
|    |                                                                                                              |                                      |  |
|    |                                                                                                              |                                      |  |
| 13 | Other financial or non-financial interests                                                                   | <u>  </u> <u>  </u> V <u>  </u> None |  |
|    |                                                                                                              |                                      |  |
|    |                                                                                                              |                                      |  |

**Please summarize the above conflict of interest in the following box:**

I, Chianyi Liu, have no conflicts of interest to declare that are relevant to the content of this article.

**Please place an "X" next to the following statement to indicate your agreement:**

   **X** I certify that I have answered every question and have not altered the wording of any of the questions on this form.



## ICMJE DISCLOSURE FORM

**Date:** 2022/11/28

**Your Name:** Hsiu-Ming Saunders

**Manuscript Title:** The Effects of Oxy-Hydrogen Medical Technology in Cigarette Smoke Solution-Induced Chronic Obstructive Pulmonary Disease Animal Model

**Manuscript number (if known):** \_\_\_\_\_

In the interest of transparency, we ask you to disclose all relationships/activities/interests listed below that are related to the content of your manuscript. "Related" means any relation with for-profit or not-for-profit third parties whose interests may be affected by the content of the manuscript. Disclosure represents a commitment to transparency and does not necessarily indicate a bias. If you are in doubt about whether to list a relationship/activity/interest, it is preferable that you do so.

The following questions apply to the author's relationships/activities/interests as they relate to the **current manuscript only**.

The author's relationships/activities/interests should be **defined broadly**. For example, if your manuscript pertains to the epidemiology of hypertension, you should declare all relationships with manufacturers of antihypertensive medication, even if that medication is not mentioned in the manuscript.

In item #1 below, report all support for the work reported in this manuscript without time limit. For all other items, the time frame for disclosure is the past 36 months.

|                                                           |                                                                                                                                                                                | Name all entities with whom you have this relationship or indicate none (add rows as needed) | Specifications/Comments (e.g., if payments were made to you or to your institution) |
|-----------------------------------------------------------|--------------------------------------------------------------------------------------------------------------------------------------------------------------------------------|----------------------------------------------------------------------------------------------|-------------------------------------------------------------------------------------|
| <b>Time frame: Since the initial planning of the work</b> |                                                                                                                                                                                |                                                                                              |                                                                                     |
| 1                                                         | All support for the present manuscript (e.g., funding, provision of study materials, medical writing, article processing charges, etc.)<br><b>No time limit for this item.</b> | the board member of HOHO Biotech Co.,Ltd.                                                    | HOHO Biotech provided funding and supplied the oxy-hydrogen device for this study.  |
|                                                           |                                                                                                                                                                                |                                                                                              |                                                                                     |
|                                                           |                                                                                                                                                                                |                                                                                              |                                                                                     |
|                                                           |                                                                                                                                                                                |                                                                                              |                                                                                     |
|                                                           |                                                                                                                                                                                |                                                                                              |                                                                                     |
| <b>Time frame: past 36 months</b>                         |                                                                                                                                                                                |                                                                                              |                                                                                     |
| 2                                                         | Grants or contracts from any entity (if not indicated in item #1 above).                                                                                                       | <u>  V  </u> None                                                                            |                                                                                     |
|                                                           |                                                                                                                                                                                |                                                                                              |                                                                                     |
| 3                                                         | Royalties or licenses                                                                                                                                                          | <u>  V  </u> None                                                                            |                                                                                     |
|                                                           |                                                                                                                                                                                |                                                                                              |                                                                                     |
| 4                                                         | Consulting fees                                                                                                                                                                | <u>  V  </u> None                                                                            |                                                                                     |
|                                                           |                                                                                                                                                                                |                                                                                              |                                                                                     |
| 5                                                         |                                                                                                                                                                                | <u>  V  </u> None                                                                            |                                                                                     |

|    |                                                                                                              |                                                        |                                                                                |
|----|--------------------------------------------------------------------------------------------------------------|--------------------------------------------------------|--------------------------------------------------------------------------------|
|    | Payment or honoraria for lectures, presentations, speakers bureaus, manuscript writing or educational events |                                                        |                                                                                |
| 6  | Payment for expert testimony                                                                                 | <u>  V  </u> None                                      |                                                                                |
| 7  | Support for attending meetings and/or travel                                                                 | <u>  V  </u> None                                      |                                                                                |
| 8  | Patents planned, issued or pending                                                                           | <u>  V  </u> None                                      |                                                                                |
| 9  | Participation on a Data Safety Monitoring Board or Advisory Board                                            | <u>  V  </u> None                                      |                                                                                |
| 10 | Leadership or fiduciary role in other board, society, committee or advocacy group, paid or unpaid            | <u>  V  </u> None                                      |                                                                                |
| 11 | Stock or stock options                                                                                       | <u>  V  </u> None                                      |                                                                                |
| 12 | Receipt of equipment, materials, drugs, medical writing, gifts or other services                             | <u>  V  </u> None                                      |                                                                                |
| 13 | Other financial or non-financial interests                                                                   | <u>  IPC Intellectual Property Connections, INC.  </u> | I am also the person in charge for IPC Intellectual Property Connections, INC. |

**Please summarize the above conflict of interest in the following box:**

I, Hsiu-Ming Saunders, the board member of HOHO Biotech, which provided funding and supplied the oxy-hydrogen device for this study. I am also the person in charge for IPC Intellectual Property Connections, INC. I declare that IPC Intellectual Property Connections, INC. has no relationship with HOHO and does not have any interest in the publication of the present article.

**Please place an "X" next to the following statement to indicate your agreement:**

  X   I certify that I have answered every question and have not altered the wording of any of the questions on this form.

## ICMJE DISCLOSURE FORM

Date: 2022/03/01

Your Name: Kuang-Yih Wang

Manuscript Title: The Effects of Oxy-Hydrogen Medical Technology in Cigarette Smoke Solution-Induced Chronic Obstructive Pulmonary Disease Animal Model

Manuscript number (if known): \_\_\_\_\_

In the interest of transparency, we ask you to disclose all relationships/activities/interests listed below that are related to the content of your manuscript. "Related" means any relation with for-profit or not-for-profit third parties whose interests may be affected by the content of the manuscript. Disclosure represents a commitment to transparency and does not necessarily indicate a bias. If you are in doubt about whether to list a relationship/activity/interest, it is preferable that you do so.

The following questions apply to the author's relationships/activities/interests as they relate to the **current manuscript only**.

The author's relationships/activities/interests should be **defined broadly**. For example, if your manuscript pertains to the epidemiology of hypertension, you should declare all relationships with manufacturers of antihypertensive medication, even if that medication is not mentioned in the manuscript.

In item #1 below, report all support for the work reported in this manuscript without time limit. For all other items, the time frame for disclosure is the past 36 months.

|                                                           |                                                                                                                                                                                | Name all entities with whom you have this relationship or indicate none (add rows as needed) | Specifications/Comments (e.g., if payments were made to you or to your institution) |
|-----------------------------------------------------------|--------------------------------------------------------------------------------------------------------------------------------------------------------------------------------|----------------------------------------------------------------------------------------------|-------------------------------------------------------------------------------------|
| <b>Time frame: Since the initial planning of the work</b> |                                                                                                                                                                                |                                                                                              |                                                                                     |
| 1                                                         | All support for the present manuscript (e.g., funding, provision of study materials, medical writing, article processing charges, etc.)<br><b>No time limit for this item.</b> | the founder of HOHO Biotech Co.,Ltd.                                                         | HOHO Biotech provided funding and supplied the oxy-hydrogen device for this study.  |
|                                                           |                                                                                                                                                                                |                                                                                              |                                                                                     |
|                                                           |                                                                                                                                                                                |                                                                                              |                                                                                     |
|                                                           |                                                                                                                                                                                |                                                                                              |                                                                                     |
|                                                           |                                                                                                                                                                                |                                                                                              |                                                                                     |
|                                                           |                                                                                                                                                                                |                                                                                              |                                                                                     |
|                                                           |                                                                                                                                                                                |                                                                                              |                                                                                     |
| <b>Time frame: past 36 months</b>                         |                                                                                                                                                                                |                                                                                              |                                                                                     |
| 2                                                         | Grants or contracts from any entity (if not indicated in item #1 above).                                                                                                       | <u>  V  </u> None                                                                            |                                                                                     |
| 3                                                         | Royalties or licenses                                                                                                                                                          | <u>  V  </u> None                                                                            |                                                                                     |
| 4                                                         | Consulting fees                                                                                                                                                                | <u>  V  </u> None                                                                            |                                                                                     |
| 5                                                         |                                                                                                                                                                                | <u>  V  </u> None                                                                            |                                                                                     |



## ICMJE DISCLOSURE FORM

**Date:** 2022/03/10

**Your Name:** Frank Lennox Douglas

**Manuscript Title:** The Effects of Oxy-Hydrogen Medical Technology in Cigarette Smoke Solution-Induced Chronic Obstructive Pulmonary Disease Animal Model

**Manuscript number (if known):** \_\_\_\_\_

In the interest of transparency, we ask you to disclose all relationships/activities/interests listed below that are related to the content of your manuscript. "Related" means any relation with for-profit or not-for-profit third parties whose interests may be affected by the content of the manuscript. Disclosure represents a commitment to transparency and does not necessarily indicate a bias. If you are in doubt about whether to list a relationship/activity/interest, it is preferable that you do so.

The following questions apply to the author's relationships/activities/interests as they relate to the **current manuscript only**.

The author's relationships/activities/interests should be **defined broadly**. For example, if your manuscript pertains to the epidemiology of hypertension, you should declare all relationships with manufacturers of antihypertensive medication, even if that medication is not mentioned in the manuscript.

In item #1 below, report all support for the work reported in this manuscript without time limit. For all other items, the time frame for disclosure is the past 36 months.

|                                                           |                                                                                                                                                                                | Name all entities with whom you have this relationship or indicate none (add rows as needed) | Specifications/Comments (e.g., if payments were made to you or to your institution) |
|-----------------------------------------------------------|--------------------------------------------------------------------------------------------------------------------------------------------------------------------------------|----------------------------------------------------------------------------------------------|-------------------------------------------------------------------------------------|
| <b>Time frame: Since the initial planning of the work</b> |                                                                                                                                                                                |                                                                                              |                                                                                     |
| 1                                                         | All support for the present manuscript (e.g., funding, provision of study materials, medical writing, article processing charges, etc.)<br><b>No time limit for this item.</b> | A board member of HOHO Biotech Co.,Ltd.                                                      | HOHO Biotech provided funding and supplied the oxy-hydrogen device for this study.  |
|                                                           |                                                                                                                                                                                |                                                                                              |                                                                                     |
|                                                           |                                                                                                                                                                                |                                                                                              |                                                                                     |
|                                                           |                                                                                                                                                                                |                                                                                              |                                                                                     |
|                                                           |                                                                                                                                                                                |                                                                                              |                                                                                     |
|                                                           |                                                                                                                                                                                |                                                                                              |                                                                                     |
|                                                           |                                                                                                                                                                                |                                                                                              |                                                                                     |
| <b>Time frame: past 36 months</b>                         |                                                                                                                                                                                |                                                                                              |                                                                                     |
| 2                                                         | Grants or contracts from any entity (if not indicated in item #1 above).                                                                                                       | <u>  V  </u> None                                                                            |                                                                                     |
| 3                                                         | Royalties or licenses                                                                                                                                                          | <u>  V  </u> None                                                                            |                                                                                     |
| 4                                                         | Consulting fees                                                                                                                                                                | <u>  V  </u> None                                                                            |                                                                                     |
| 5                                                         |                                                                                                                                                                                | <u>  V  </u> None                                                                            |                                                                                     |

|    |                                                                                                              |                                   |  |
|----|--------------------------------------------------------------------------------------------------------------|-----------------------------------|--|
|    | Payment or honoraria for lectures, presentations, speakers bureaus, manuscript writing or educational events |                                   |  |
| 6  | Payment for expert testimony                                                                                 | <u>  </u> <u>V</u> <u>  </u> None |  |
| 7  | Support for attending meetings and/or travel                                                                 | <u>  </u> <u>V</u> <u>  </u> None |  |
| 8  | Patents planned, issued or pending                                                                           | <u>  </u> <u>V</u> <u>  </u> None |  |
| 9  | Participation on a Data Safety Monitoring Board or Advisory Board                                            | <u>  </u> <u>V</u> <u>  </u> None |  |
| 10 | Leadership or fiduciary role in other board, society, committee or advocacy group, paid or unpaid            | <u>  </u> <u>V</u> <u>  </u> None |  |
| 11 | Stock or stock options                                                                                       | <u>  </u> <u>V</u> <u>  </u> None |  |
| 12 | Receipt of equipment, materials, drugs, medical writing, gifts or other services                             | <u>  </u> <u>V</u> <u>  </u> None |  |
| 13 | Other financial or non-financial interests                                                                   | <u>  </u> <u>V</u> <u>  </u> None |  |

**Please summarize the above conflict of interest in the following box:**

I, - Frank Lennox Douglas, a board member of HOHO Biotech, which provided funding and supplied the oxy-hydrogen device for this study.

**Please place an "X" next to the following statement to indicate your agreement:**

   **X** I certify that I have answered every question and have not altered the wording of any of the questions on this form.
