# Supplementary material for: The effects of hydrogen treatment in a cigarette smoke solution-induced chronic obstructive pulmonary disease-like changes in an animal model
Source: PubMed Central journal article supplement — J Thorac Dis. 2022 Nov;14(11):4246–55. doi: 10.21037/jtd-22-324 (PMC9745525; doi:10.21037/jtd-22-324), 2022-11
Supplement: jtd-14-11-4246-dss.pdf [file jtd-14-11-4246-dss.pdf]

## Data Sharing Statement

|                     |                                                                                                                                                    |                                                                                                                 |
|---------------------|----------------------------------------------------------------------------------------------------------------------------------------------------|-----------------------------------------------------------------------------------------------------------------|
| <b>Article Info</b> | https://dx.doi.org/10.21037/jtd-22-324                                                                                                             |                                                                                                                 |
| <b>Item</b>         | <b>Question</b>                                                                                                                                    | <b>Authors' Response<br/>(place "-" if not applicable)</b>                                                      |
| 1                   | Would you like to share data collected for your study to others?                                                                                   | Yes                                                                                                             |
| 2                   | If not, would you like to share the reason for your decision?                                                                                      | -                                                                                                               |
| 3                   | What data in particular will be shared?                                                                                                            | The survival data in particular will be shared, and the raw data of the histopathological changes in mice lung. |
| 4                   | Any other documents will be share? Such as study protocol, statistical analysis plan, informed consent form, clinical study report, analytic code. | No                                                                                                              |
| 5                   | When will data availability begin?                                                                                                                 | From the publication date.                                                                                      |
| 6                   | When will data availability end?                                                                                                                   | -                                                                                                               |
| 7                   | To whom will you share the data?                                                                                                                   | Researchers who are interested in studying the therapeutic use of molecular hydrogen.                           |
| 8                   | For what type of analysis or purpose?                                                                                                              | For further hydrogen therapy research and clinical application                                                  |
| 9                   | How or where can the data/documents be obtained?                                                                                                   | Please contact the corresponding author.<br>frankldouglas@gmail.com                                             |
| 10                  | Any other restrictions?                                                                                                                            | We may evaluate the potential benefits and risks for each request to determine the extent of data sharing.      |
